# Supplementary material for: Metabolite Profiling and Classification of Developing Styrax tonkinensis Kernels
Source: MDPI journal article supplement (doi:10.3390/metabo10010021), 2020-01-01
Supplement: s1 [file s1]

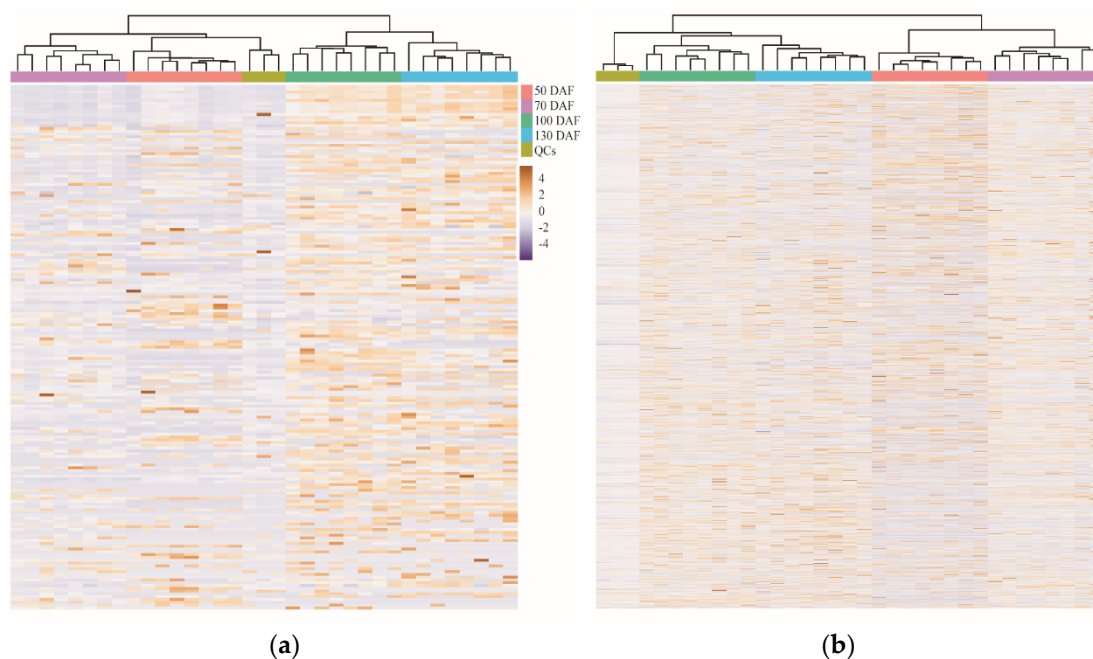

**Figure S1.** The result of hierarchical cluster analysis (HCA) in GC-MS and LC-MS analyses.  
 (A) HCA analysis in GC-MS. (B) HCA analysis in LC-MS
